# Supplementary material for: Cost-effectiveness and societal burden implications of screening for fracture risk in a UK general radiography setting
Source: Research Square preprint supplement (doi:10.21203/rs.3.rs-4739580/v1), 2024-08-01
Supplement: Supplementary file 1 [file 07308b8e2c9e80bf39863a7b.docx]

*Table 2. Base case analysis for incremental cost-effectiveness*

|  | **Screening with IBEX BH** | **Usual care** | **Difference** |
| --- | --- | --- | --- |
| **Cost components (£)** |  |  |  |
| Fracture care costs | 3,684 | 3,726 | -42 |
| Nursing home costs | 10,521 | 10,628 | -107 |
| Intervention costs | 61 | 21 | 40 |
| Total costs | 14,266 | 14,375 | -109 |
|  |  |  |  |
| **Effects** |  |  |  |
| QALYs | 9.198 | 9.185 | 0.013 |
| Life years | 11.604 | 11.592 | 0.012 |
|  |  |  |  |
| **ICER (£)** |  |  | Cost-saving |
