# Supplementary material for: Cost-effectiveness and societal burden implications of screening for fracture risk in a UK general radiography setting
Source: Research Square preprint supplement (doi:10.21203/rs.3.rs-4739580/v1), 2024-08-01
Supplement: Supplementary file 2 [file 209dd4f436269121494a9e0a.docx]

*Table 3. Incremental costs, quality-adjusted life years (QALYs) and incremental cost-effectiveness ratio (ICER) by sex, age group, fracture prevalence and T-score at baseline*

|  | **Age 50**–**59** | | **Age 60**–**69** | | **Age 70**–**79** | | **Age 80–90** | |
| --- | --- | --- | --- | --- | --- | --- | --- | --- |
| **T-score** | **Fracture** | **No fracture** | **Fracture** | **No fracture** | **Fracture** | **No fracture** | **Fracture** | **No fracture** |
| **Incremental costs** | | | | | | | | |
| Women | | | | | | | | |
| -1 | £34 | £37 | £25 | £33 | -£13 | £14 | -£56 | -£5 |
| -1.5 | £28 | £34 | £14 | £27 | -£45 | -£1 | -£111 | -£32 |
| -2 | £20 | £29 | -£1 | £19 | -£92 | -£24 | -£197 | -£73 |
| -2.5 | £10 | £24 | -£23 | £8 | -£161 | -£58 | -£327 | -£136 |
| -3 | -£4 | £16 | -£54 | -£8 | -£263 | -£110 | -£523 | -£232 |
| -3.5 | -£22 | £6 | -£96 | -£31 | -£409 | -£185 | -£813 | -£378 |
| -4 | -£48 | -£8 | -£155 | -£62 | -£616 | -£294 | -£1 232 | -£594 |
| Men | | | | | | | | |
| -1 | £35 | £37 | £28 | £34 | £7 | £24 | -£14 | £14 |
| -1.5 | £28 | £34 | £18 | £29 | -£14 | £14 | -£46 | -£1 |
| -2 | £19 | £29 | £4 | £22 | -£46 | -£1 | -£96 | -£24 |
| -2.5 | £6 | £23 | -£17 | £12 | -£92 | -£24 | -£171 | -£60 |
| -3 | -£12 | £14 | -£46 | -£3 | -£161 | -£59 | -£284 | -£116 |
| -3.5 | -£36 | £0 | -£87 | -£25 | -£259 | -£109 | -£454 | -£200 |
| -4 | -£70 | -£18 | -£143 | -£55 | -£399 | -£182 | -£703 | -£326 |
| **Incremental QALYs** | | | | | | | | |
| Women | | | | | | | | |
| -1 | 0.003 | 0.002 | 0.003 | 0.002 | 0.005 | 0.002 | 0.005 | 0.002 |
| -1.5 | 0.004 | 0.002 | 0.005 | 0.002 | 0.007 | 0.003 | 0.007 | 0.003 |
| -2 | 0.006 | 0.003 | 0.006 | 0.003 | 0.009 | 0.005 | 0.010 | 0.005 |
| -2.5 | 0.008 | 0.004 | 0.008 | 0.004 | 0.012 | 0.006 | 0.013 | 0.007 |
| -3 | 0.010 | 0.005 | 0.011 | 0.006 | 0.016 | 0.008 | 0.018 | 0.009 |
| -3.5 | 0.013 | 0.007 | 0.014 | 0.008 | 0.021 | 0.011 | 0.024 | 0.013 |
| -4 | 0.017 | 0.009 | 0.018 | 0.010 | 0.026 | 0.015 | 0.031 | 0.017 |
| Men | | | | | | | | |
| -1 | 0.003 | 0.001 | 0.003 | 0.002 | 0.004 | 0.002 | 0.004 | 0.002 |
| -1.5 | 0.004 | 0.002 | 0.005 | 0.002 | 0.005 | 0.002 | 0.005 | 0.002 |
| -2 | 0.006 | 0.003 | 0.006 | 0.003 | 0.007 | 0.004 | 0.007 | 0.003 |
| -2.5 | 0.008 | 0.004 | 0.009 | 0.004 | 0.010 | 0.005 | 0.010 | 0.005 |
| -3 | 0.011 | 0.006 | 0.012 | 0.006 | 0.014 | 0.007 | 0.014 | 0.007 |
| -3.5 | 0.015 | 0.008 | 0.016 | 0.008 | 0.018 | 0.010 | 0.019 | 0.009 |
| -4 | 0.020 | 0.010 | 0.021 | 0.011 | 0.024 | 0.013 | 0.025 | 0.013 |
| **Incremental cost-effectiveness ratio (ICER)** | | | | | | | | |
| Women | | | | | | | | |
| -1 | £10 437 | £22 524 | £7 537 | £20 016 | Cost-saving | £6 114 | Cost-saving | Cost-saving |
| -1.5 | £6 422 | £15 202 | £3 144 | £12 151 | Cost-saving | Cost-saving | Cost-saving | Cost-saving |
| -2 | £3 447 | £9 806 | Cost-saving | £6 283 | Cost-saving | Cost-saving | Cost-saving | Cost-saving |
| -2.5 | £1 245 | £5 843 | Cost-saving | £1 880 | Cost-saving | Cost-saving | Cost-saving | Cost-saving |
| -3 | Cost-saving | £2 937 | Cost-saving | Cost-saving | Cost-saving | Cost-saving | Cost-saving | Cost-saving |
| -3.5 | Cost-saving | £791 | Cost-saving | Cost-saving | Cost-saving | Cost-saving | Cost-saving | Cost-saving |
| -4 | Cost-saving | Cost-saving | Cost-saving | Cost-saving | Cost-saving | Cost-saving | Cost-saving | Cost-saving |
| Men | | | | | | | | |
| -1 | £11 320 | £25 075 | £8 568 | £21 546 | £1 827 | £13 454 | Cost-saving | £8 579 |
| -1.5 | £6 669 | £16 496 | £3 995 | £13 249 | Cost-saving | £5 557 | Cost-saving | Cost-saving |
| -2 | £3 255 | £10 244 | £586 | £7 165 | Cost-saving | Cost-saving | Cost-saving | Cost-saving |
| -2.5 | £755 | £5 710 | Cost-saving | £2 708 | Cost-saving | Cost-saving | Cost-saving | Cost-saving |
| -3 | Cost-saving | £2 435 | Cost-saving | Cost-saving | Cost-saving | Cost-saving | Cost-saving | Cost-saving |
| -3.5 | Cost-saving | £64 | Cost-saving | Cost-saving | Cost-saving | Cost-saving | Cost-saving | Cost-saving |
| -4 | Cost-saving | Cost-saving | Cost-saving | Cost-saving | Cost-saving | Cost-saving | Cost-saving | Cost-saving |
