# Supplementary material for: Cost-effectiveness and societal burden implications of screening for fracture risk in a UK general radiography setting
Source: Research Square preprint supplement (doi:10.21203/rs.3.rs-4739580/v1), 2024-08-01
Supplement: Supplementary file 3 [file 4aa207f433452937f04127cc.docx]

*Table 1. Decision tree probabilities and treatment inputs. OP=osteoporosis, HR=hazard ratio*

| **Parameter** | **Value** | **Source and Comments** |
| --- | --- | --- |
| **IBEX BH strategy** |  |  |
| IBEX BH sensitivity | 0.93 | Data from Meertens et al. (12, 13) |
| IBEX BH specificity | 0.89 | Data from Meertens et al. (12, 13) |
| Share of fractured patients needing OP treatment | 0.28 | Data from Royal Cornwall Hospitals NHS Trust Hospital (14).  Based on the prevalence of treatment recommendation after DXA. |
| Share of non-fractured patients needing OP treatment | 0.18 | Data from the OFFER1 trial (Meertens et al. (12, 13)). Based on the prevalence of NOGG treatment recommendation by FRAX with aBMD. |
| Referral probability, fractured patients | 0.34 | Share of fractured patients needing OP treatment adjusted for IBEX BH sensitivity plus false positives (0.93*0.28 + (1-0.89)*(1-0.28)) |
| Referral probability, non-fractured patients | 0.26 | Share of non-fractured patients needing OP treatment adjusted for IBEX BH sensitivity plus false positives (0.93*0.18 + (1-0.89)*(1-0.18)) |
| Probability of receiving DXA, given they are referred for a bone health assessment | 0.91 | Data from Royal Cornwall Hospitals NHS Trust Hospital. |
| Probability of starting OP treatment, fractured patients after DXA | 0.77 | Share of fractured patients needing OP treatment adjusted for IBEX BH sensitivity by referral probability (0.93*0.28/0.34). Note that the probability of starting OP treatment is higher than usual care owing to the fact that IBEX BH is screening patients ahead of DXA. |
| Probability of starting OP treatment, non-fractured patients after DXA | 0.64 | Share of non-fractured patients needing OP treatment adjusted for IBEX BH sensitivity by referral probability (0.93*0.18/0.263) |
| Probability of starting OP treatment, patients without DXA, fractured and non-fractured | 1 | Data from Royal Cornwall Hospitals NHS Trust Hospital.  Data on referrals that did not end with treatment recommendation or DXA were not available. It was assumed that referred all patients who did not have DXA received treatment (9% of those referred for osteoporosis assessment) |
| **Usual care** |  |  |
| Referral probability, fractured patients | 0.20 | Data from Royal Cornwall Hospitals NHS Trust Hospital.  Calibrated to reflect proportion recommended treatment in current care since there was no data available on referrals that did not end with treatment recommendation or DXA |
| Referral probability, non-fractured patients | 0.08 |
| Probability of receiving DXA, fractured patients | 0.97 |
| Probability of receiving DXA, non-fractured patients | 0.91 |
| Probability of starting OP treatment, fractured patients after DXA | 0.28 |
| Probability of starting OP treatment, non-fractured patients after DXA | 0.26 |
| Probability of starting OP treatment, patients without DXA, fractured and non-fractured | 1 |
| **OP treatments received (%)** |  |  |
| Alendronate | 0.79 | Tan et al. (15), assumed to be weekly alendronate 70 mg in the model |
| Other oral bisphosphonates | 0.12 | Tan et al. (15), assumed to be weekly risedronate 35 mg in the model |
| Intravenous bisphosphonates | 0.01 | Tan et al. (15), assumed to be annual zoledronate 5 mg in the model |
| Denosumab | 0.08 | Tan et al. (15), bi-annual subcutaneous injection 60 mg |
| Raloxifene | 0.003 | Tan et al. (15), daily oral 60 mg |
| Teriparatide | 0.003 | Tan et al. (15), daily subcutaneous injection 20 µg |
| **Fracture risk reduction from pharmaceutical treatment (HRs vs. placebo)** |  |  |
| Hip fracture | 0.64 | Network meta-analysis by Davis et al. (16), weighted for drug distribution (15) |
| Vertebral fracture | 0.49 | Network meta-analysis by Davis et al. (16), weighted for drug distribution (15) |
| Forearm fracture | 0.85 | Network meta-analysis by Davis et al. (16), weighted for drug distribution (15) |
| Other fracture | 0.77 | Network meta-analysis by Davis et al. (16) non-vertebral fractures, weighted for drug distribution (15) |
