# Supplementary material for: Cost-effectiveness and societal burden implications of screening for fracture risk in a UK general radiography setting
Source: Research Square preprint supplement (doi:10.21203/rs.3.rs-4739580/v1), 2024-08-01
Supplement: Supplementary file 4 [file b7a49c8879626564d8293386.docx]

*Table 4. One-way sensitivity analysis*

| **Sensitivity analysis** | **Base case setting** | **Incremental QALYs** | **Incremental costs (£)** | **Incremental cost-effectiveness ratio (£)** |
| --- | --- | --- | --- | --- |
| Population averaged over proportions below/above intervention thresholds according to NOGG | Population averaged over sex, age-group, T-score, and prior fracture | 0.011 | -64 | Cost-saving |
| Proportion of patients in need of treatment +10% | Non-fractured 18%, fractured 28% | 0.014 | -122 | Cost-saving |
| Proportion of patients in need of treatment +20% | Non-fractured 18%, fractured 28% | 0.015 | -135 | Cost-saving |
| Proportion of patients in need of treatment +30% | Non-fractured 18%, fractured 28% | 0.016 | -149 | Cost-saving |
| Proportion of fractured patients in need of treatment 100% | 28% | 0.030 | -418 | Cost-saving |
| Referral probability fractured patients current strategy 80% (FLS) | 18% / 20% IBEX BH strategy / current strategy | 0.004 | -37 | Cost-saving |
| Treatment length 3 years | 2 years | 0.016 | -149 | Cost-saving |
| Treatment length 4 years | 2 years | 0.018 | -190 | Cost-saving |
| Treatment length 5 years | 2 years | 0.020 | -230 | Cost-saving |
| Treatment length 10 years | 2 years | 0.028 | -393 | Cost-saving |
| Excess mortality 100% | 30% | 0.015 | -57 | Cost-saving |
| Time horizon 10 years | Lifetime | 0.005 | -101 | Cost-saving |
| Discount rate of health effects & costs 0% | 3.5% | 0.021 | -144 | Cost-saving |
| Discount rate of health effects & costs 5% | 3.5% | 0.007 | -101 | Cost-saving |
